# Supplementary material for: Fibulin-2 is an extracellular matrix inhibitor of oligodendrocytes relevant to multiple sclerosis
Source: JCI journal article supplement (doi:10.1172/jci176910), 2024-05-14

Supplemental Figure 1B

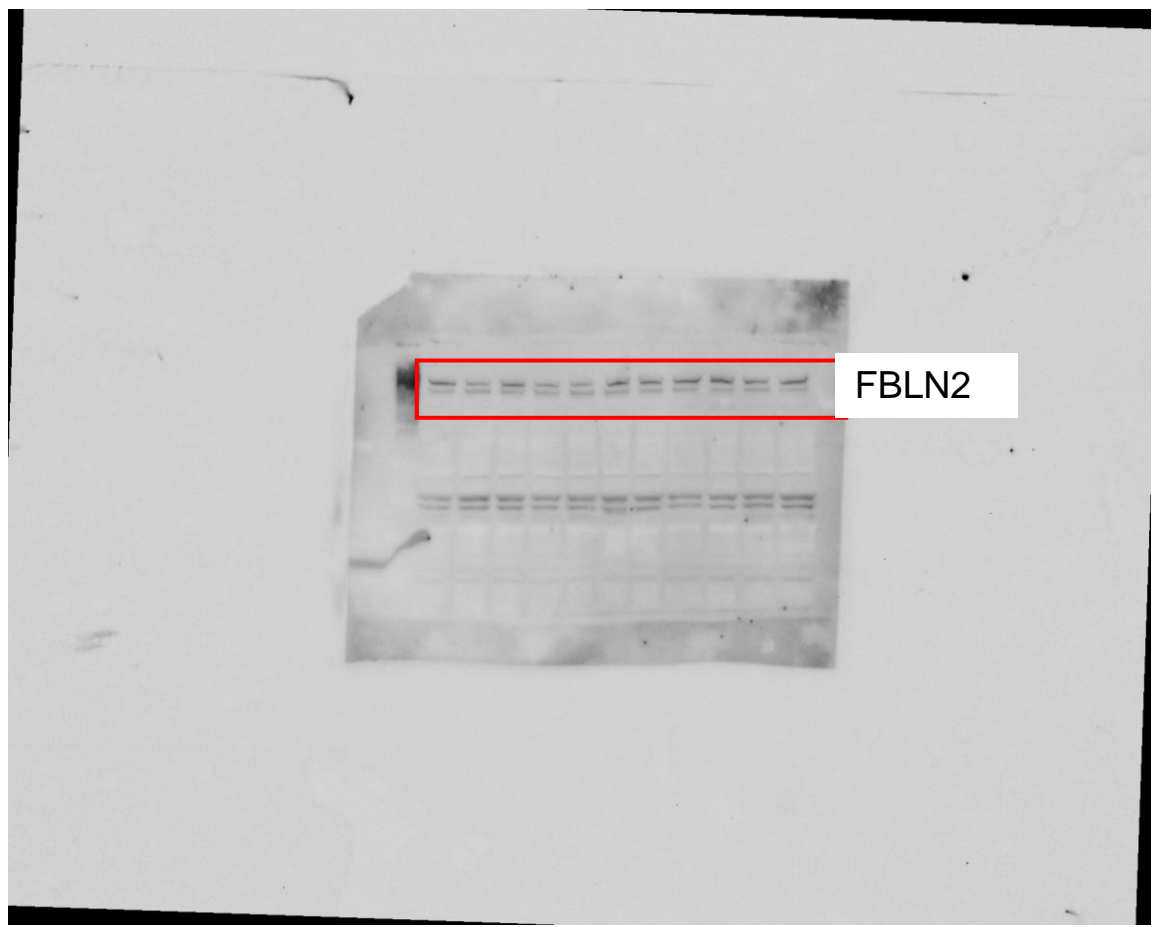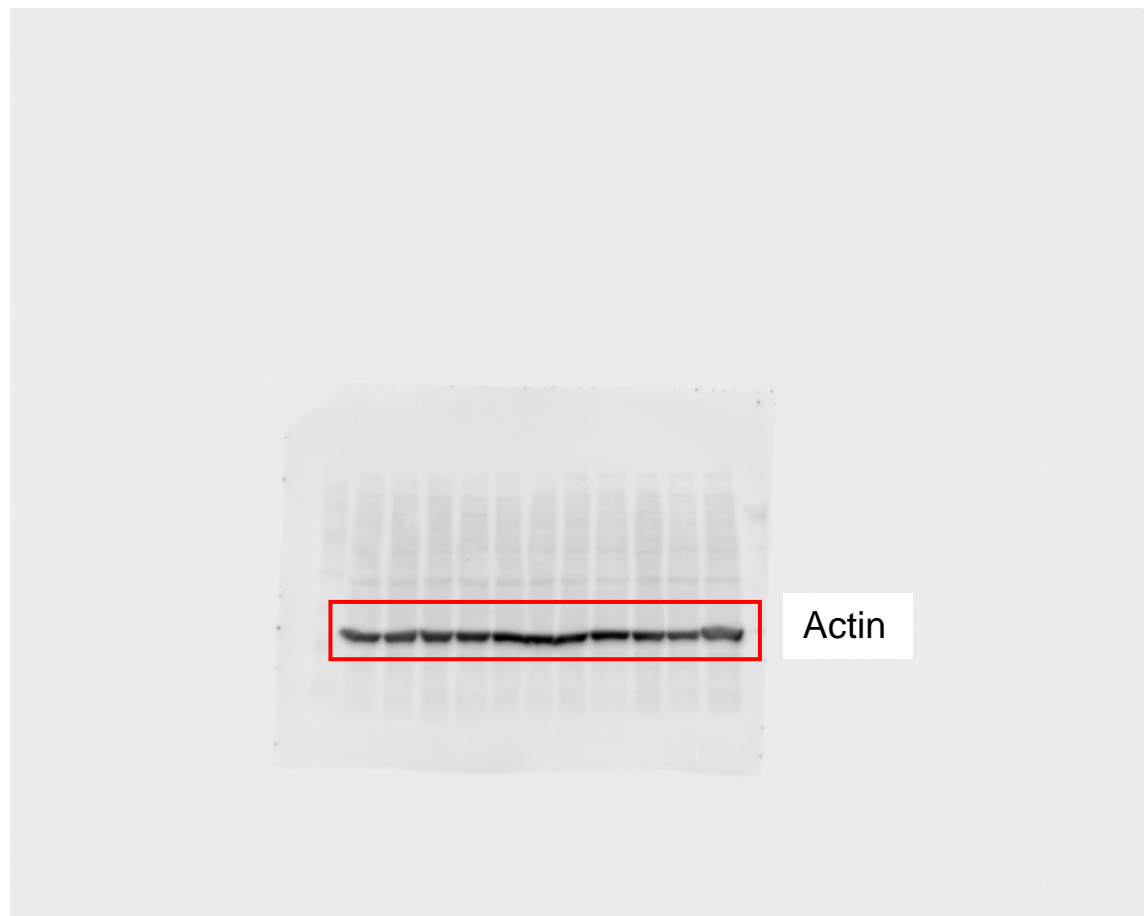

# Supplemental Figure 5G

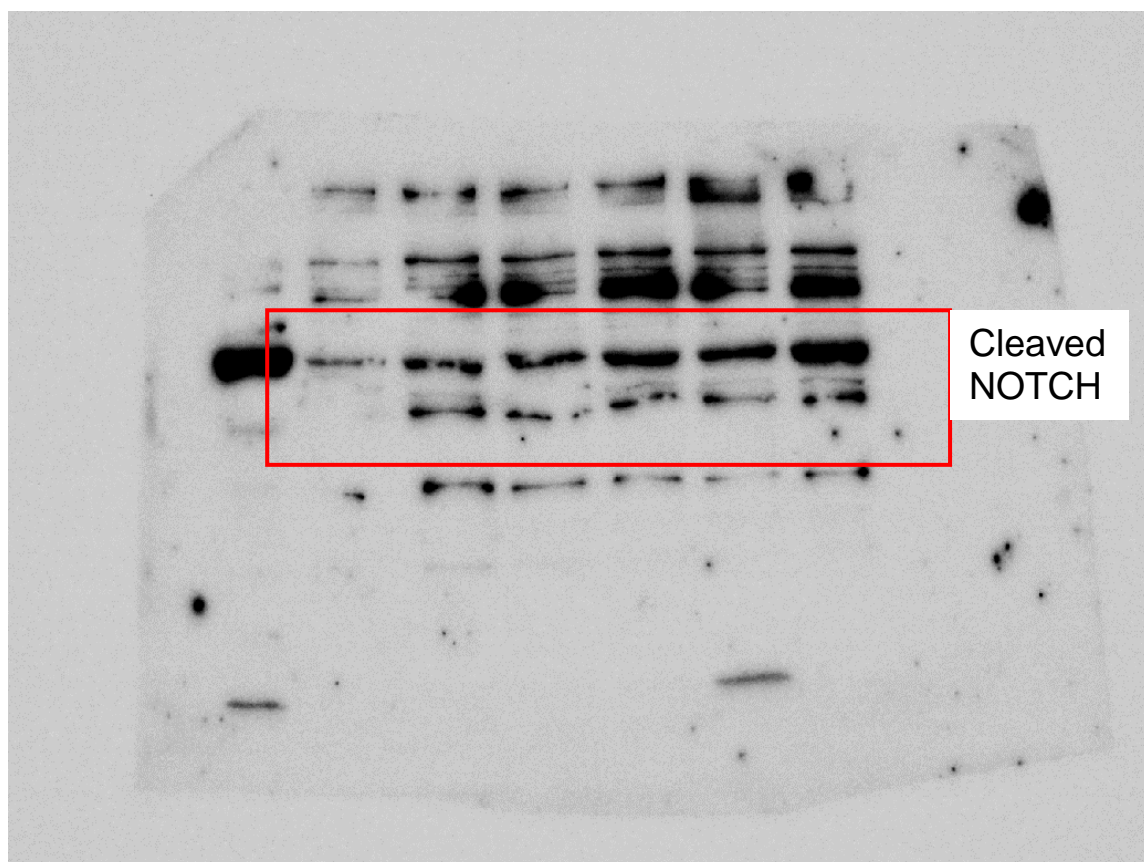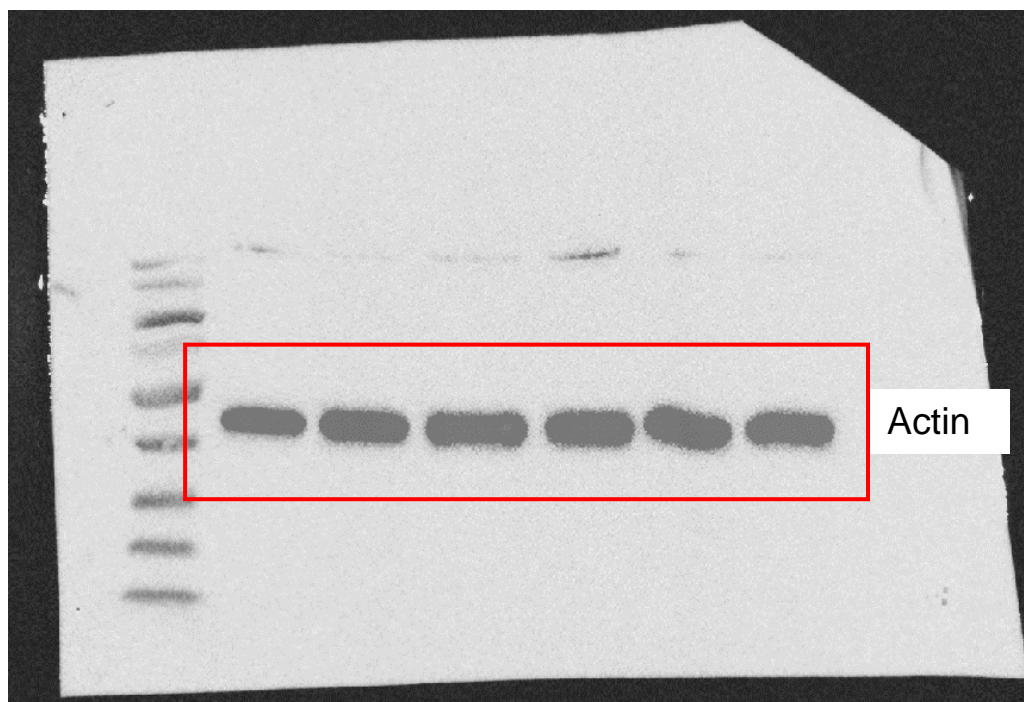

Supplemental Figure 6J

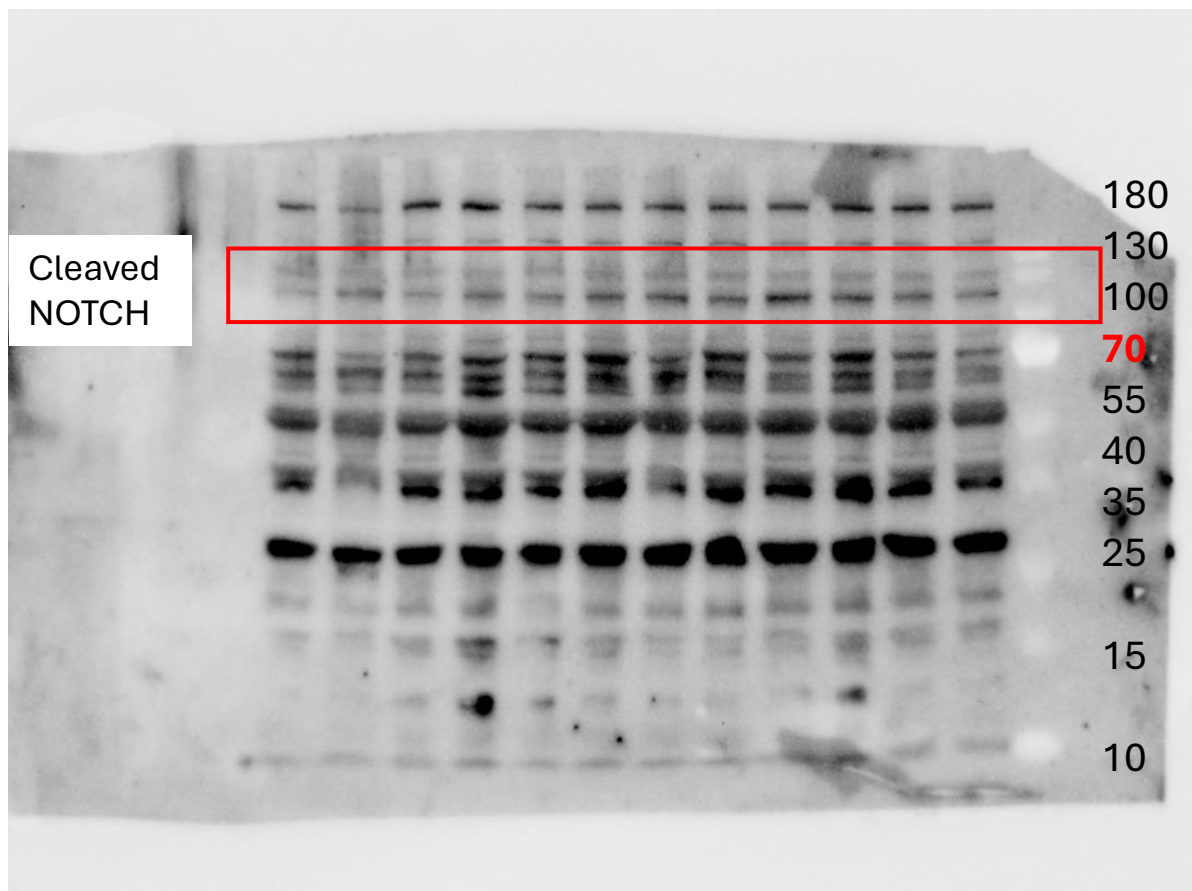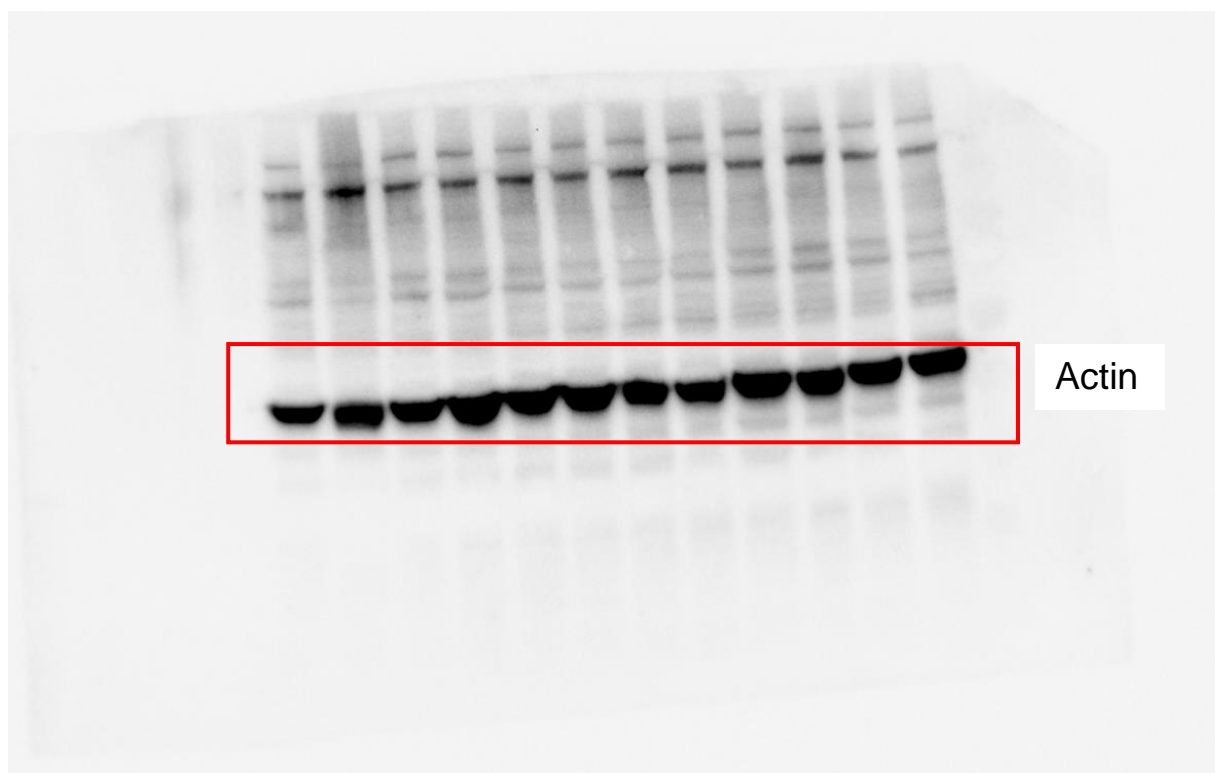

Supplemental Figure 6L

180  
130  
100  
**70**  
55  
40  
35  
25  
15  
10

Cleaved  
Caspase 9

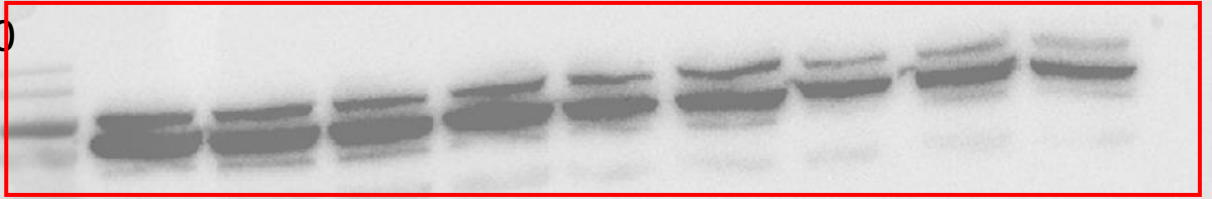

Actin

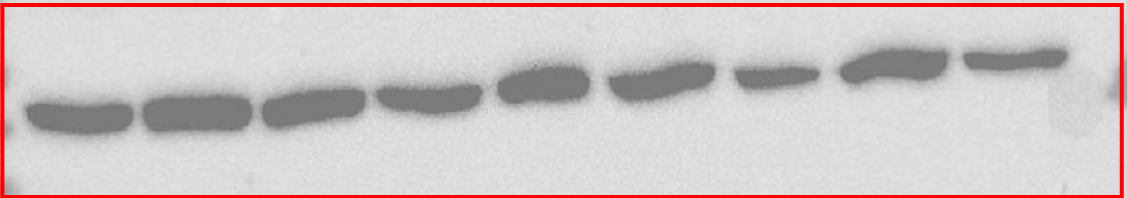

Supplemental Figure 8F

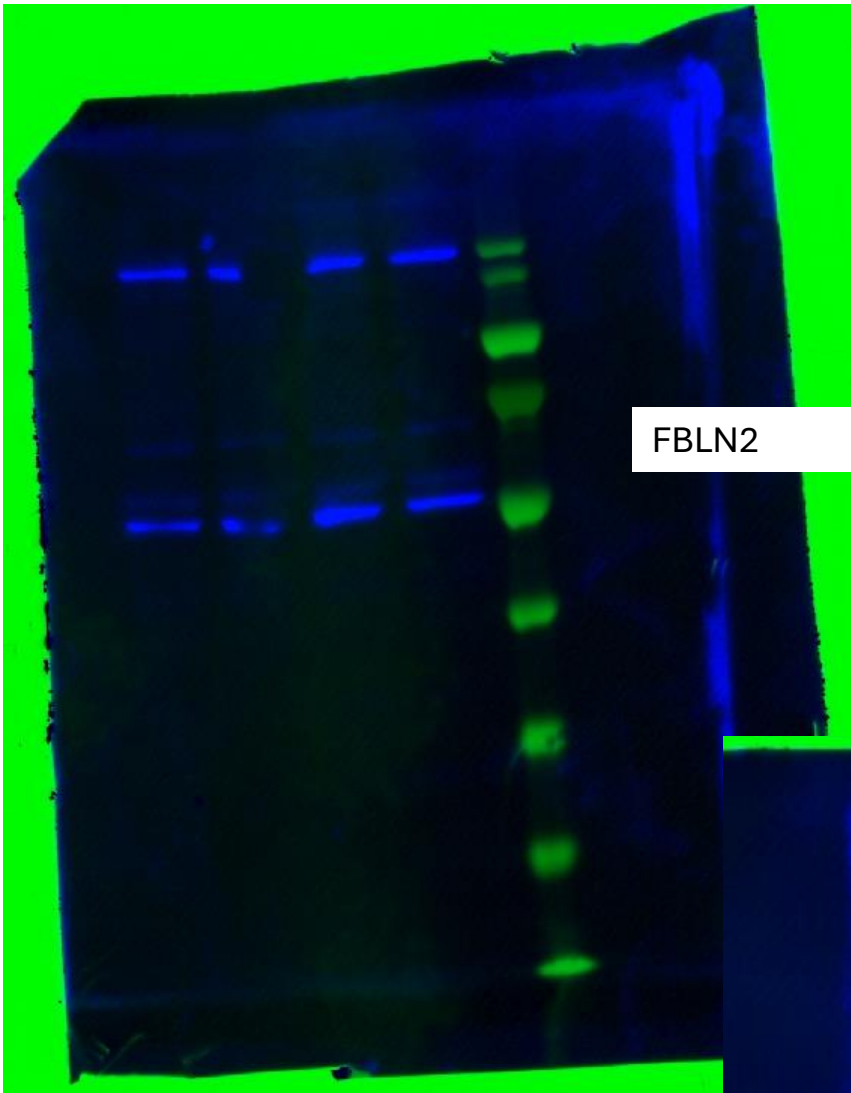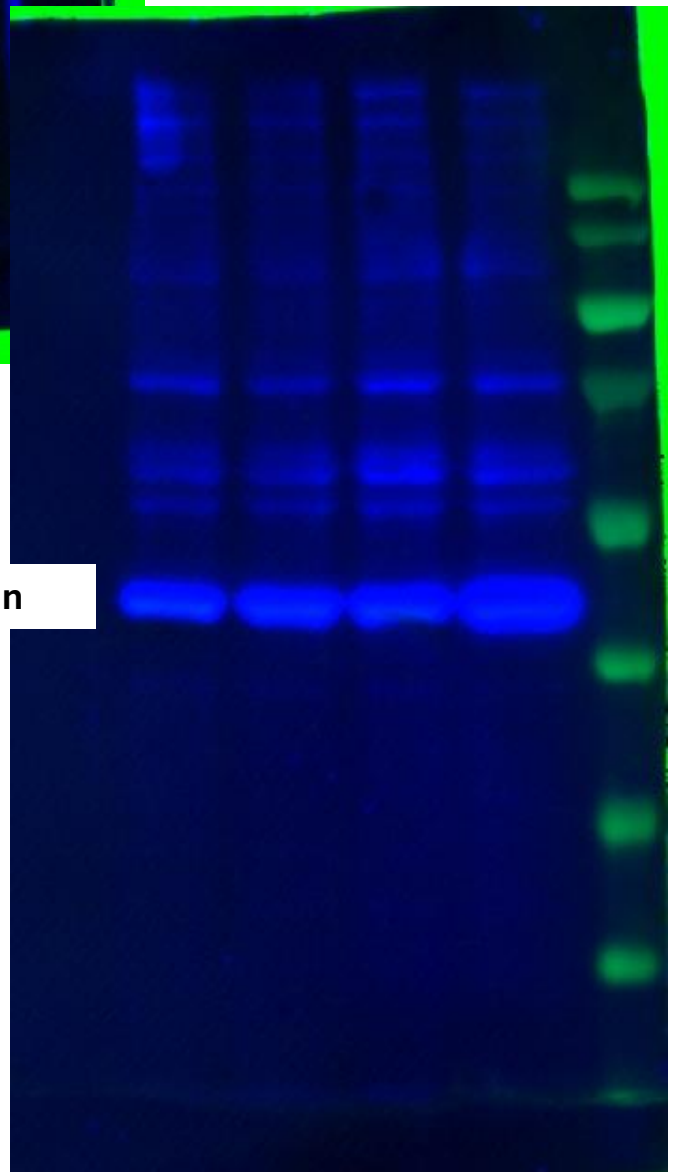



Supplemental Figure 8H

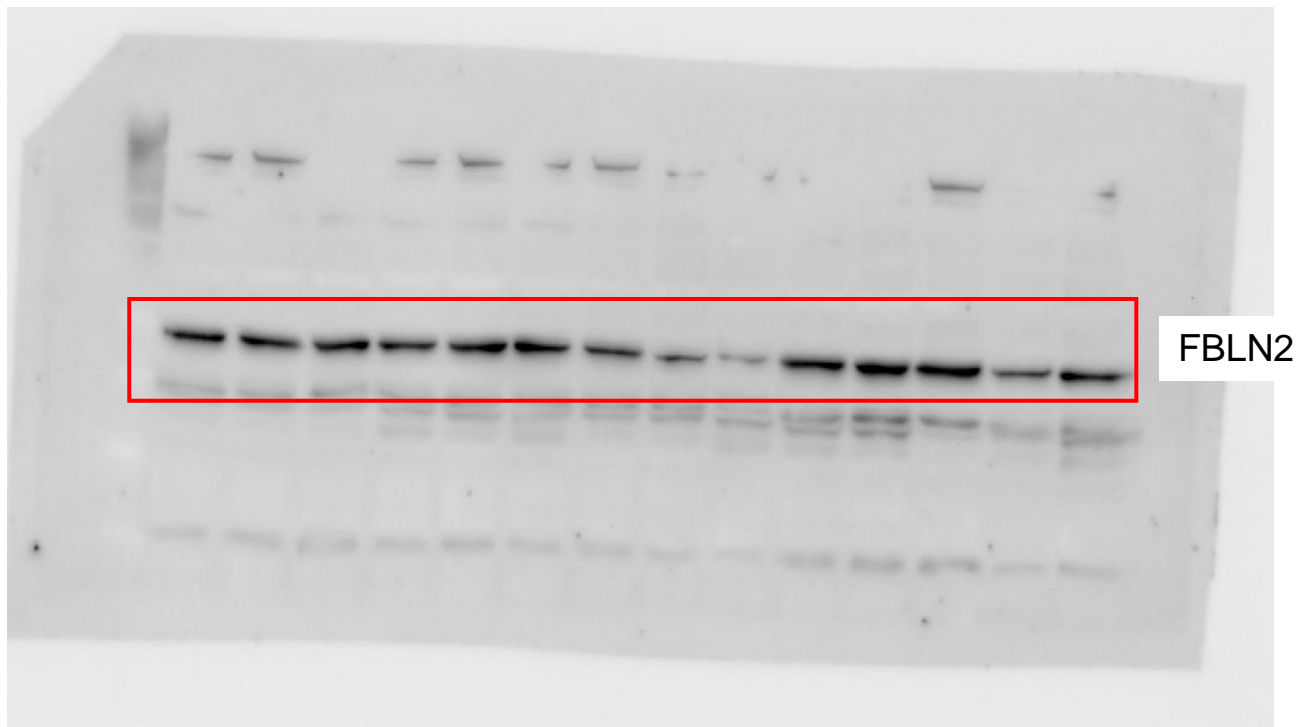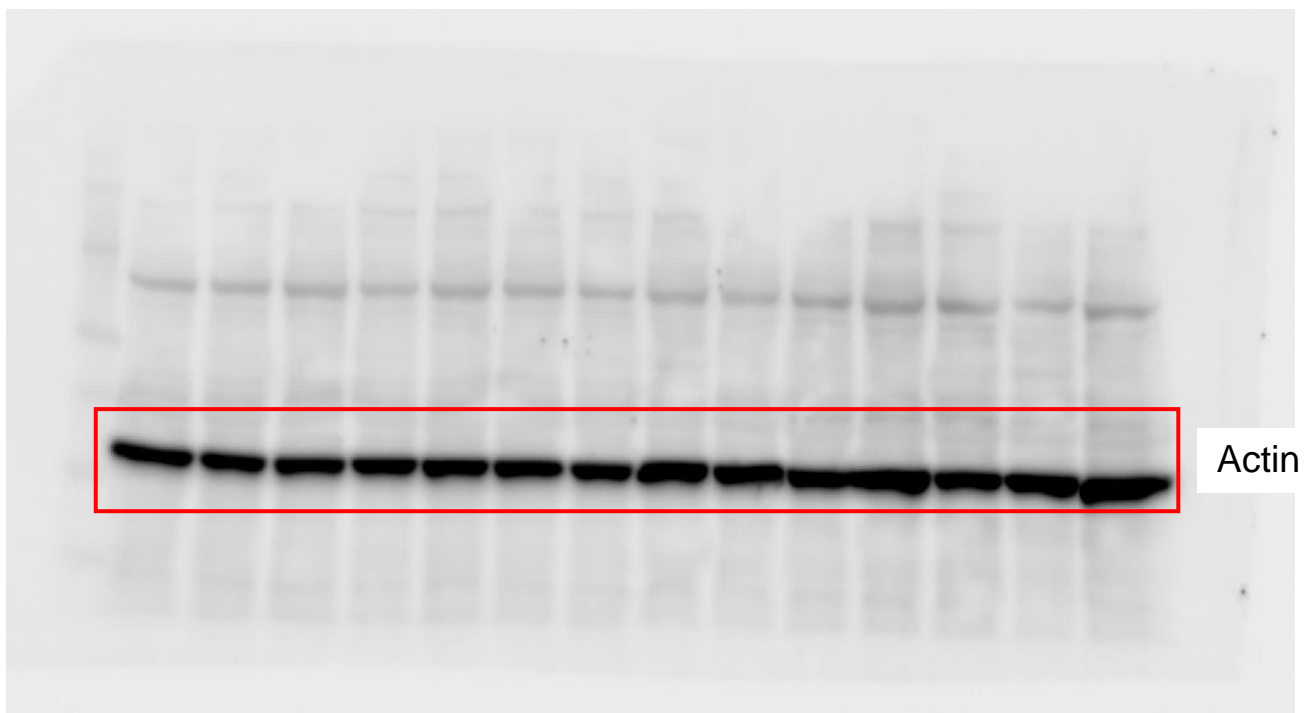

Supplement: sd2 [file 2]
